# Supplementary material
Source: PubMed Central journal article supplement (PMC6500550)

Supplemental Figure 1. Flow chart of screening, enrollment, and RNA-Seq performance.

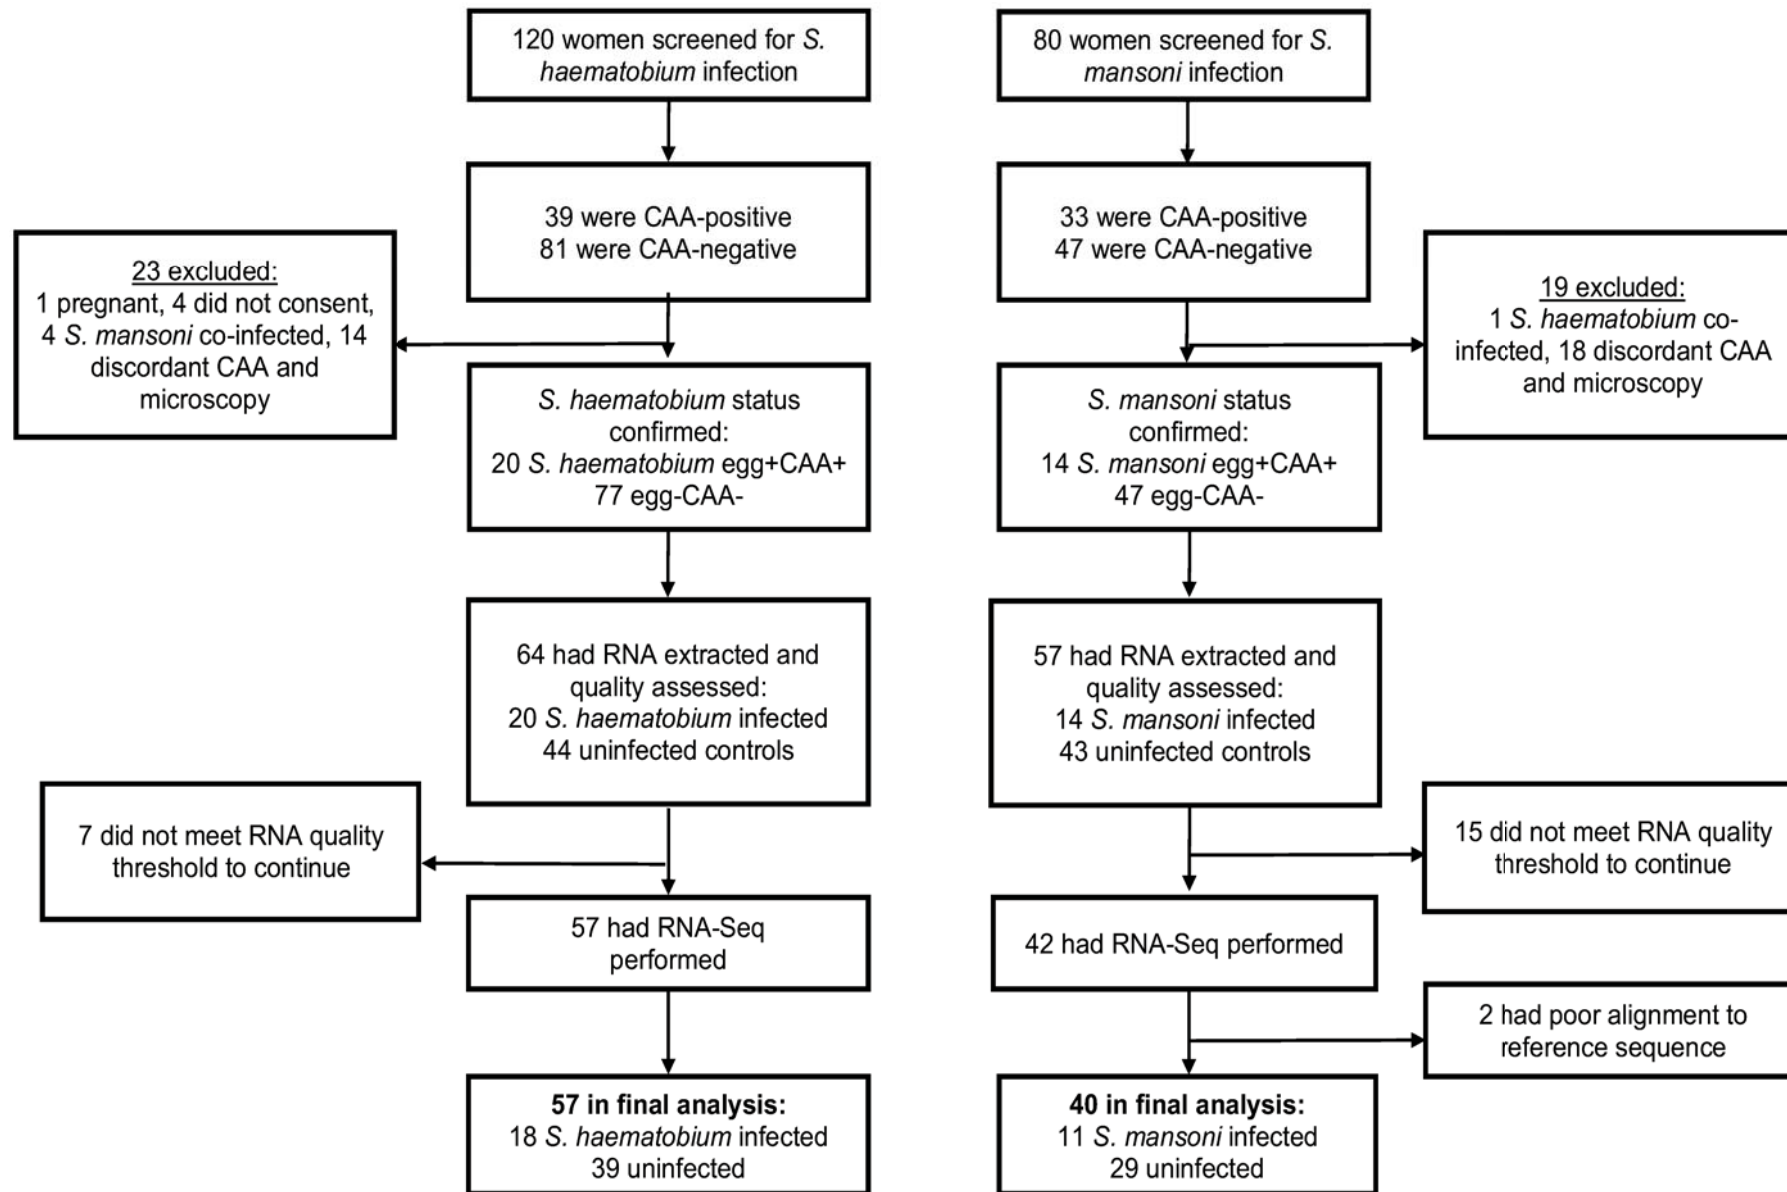

Supplement: jiy742_suppl_supplementary_figure_s1.pdf [file jiy742_suppl_supplementary_figure_s1.pdf]
